# Supplementary material for: Cloning and characterization of wnt4a gene and evidence for positive selection in half-smooth tongue sole (Cynoglossus semilaevis)
Source: PubMed Central journal article supplement — Sci Rep. 2014 Nov 24;4:7167. doi: 10.1038/srep07167 (PMC4241513; doi:10.1038/srep07167), 2014-11-24
Supplement: srep07167-s1.pdf [file srep07167-s1.pdf]

# **Cloning and characterization of wnt4a gene and evidence for positive selection in half-smooth tongue sole( *Cynoglossus semilaevis*)**

Qiaomu Hu, Ying Zhu, Yang Liu, Na Wang, Songlin Chen

## **Supplementary Information :**

Fig. S1 Nucleotide sequence of the half-smooth tongue sole wnt4a cDNA. The red dot represents the signal peptide cleavage site. The box represents glycosylation sites. The WNT conserved domains are highlighted and the methylated island is underlined.

Fig. S2 Sense probe detected the gonads of female and male. F: female gonad, M: male gonad

Fig. S3 Multiple comparisons of the methylation level among different gonads

Fig. S4 Alignment of the 36 amino acid sequences, The WNT conserved domains are highlighted and the blue dot represents the glycosylation sites and the red dot represents the positively selected site in tongue sole.

Table. S1 Primers and their sequences used in this study.

Table. S2 Accession numbers of Wnt4 sequences used in this study.

acatg<sup>ggg</sup>gagtgctgtgagaagtgaagacacaggagcaggagcagcagtgagaggaggagt 61  
 agactcg<sup>g</sup>cgcgctccgca<sup>g</sup>cgctcaaggtaaaatctggagagaaccgaggcgcgcagtcggacagtaag 130  
 tcttgtagccgctgggtgcagcagcagcaataacaacaacaaccacaaagtataagctttaagc 199  
 cgtgagtgcaacaggaggtggaggtgaaggaggaggagcccgatcggagctcctgcagccggcggtcat 268  
 cggactgacactcagegcatectctagtg<sup>g</sup>ctggagtgctctggaaggaaaagcgcgtgttetgetaaaag 337  
 gctcgggttgatgctgagctctgactgtccagtcacaactacaactactatttatcatttgatgtatgctc 406  
 gcttccttctg<sup>g</sup>cgcgctcggagcggcagagaggacgggacatctccgtgggtggatggaccg<sup>g</sup>ggagct 475  
 gcgttctcactcctccgctaacaggatgatggattaaacgcttctcctcgcgaccggtctgtttcacttctg 544  
 acttttccctcaccgctctcgggattatttgatctctctg<sup>g</sup>gcttccactccacccccaccatctcgag 613  
 ATGACCGAAGACTGCGTCTGCGCTGCGTCTGATGCTCTGCTGTGCGTCTCTCCGCCAACGCCAGT 682  
 M **T** E D C V L R C V L M L C C A L L S A **N** A **S** 23  
 AACTGGTTATACTTGGCCAAGCTGTCGTCAGTAGGGAGCATCAGGGATGAGGAGACATGTGAGCGGTTA 751  
 N W L Y L A K L S S V G S I R D E E T C E **R** L 46  
 CGAGGCCTCATCCAGAGACAGGTCCAGATCTGTAAGCGCAGCGTGGAGGTGATGGATGCAGTGCCTCGC 820  
**R** G L I Q R Q V Q I C K R **S** V E V M D A V R R 69  
 GGGGCTCAGCTGGCCATAGACGAATGCCAGTTTCAGTTCGCAACCGACGATGGA<sup>ACT</sup>GTTCAACTCTG 889  
**G** A Q L A I D E C Q F Q F R N R R W **N** C S T L 92  
 GAGACAATGCCTGTGTTTGGCAAAGTGGTCACACAGGGCACCCGTGAGGCTGCCTTTGTTTGTGTCATC 958  
**E** T M P V F G K V V **T** Q G T R E A A F V C V I 115  
 TCAGCGTCCATTGTGGCGTTTGGCGTAACGAGGGCCTGCAGCAGCGGAGAGCTGGAAAAATGTGGCTGT 1027  
**S** A S I V A F A V T R A C S S G E L E K C G C 138  
 GACCACAATGTACATGGAGTCAGTCCAGAGGGGTTCCAGTGGTCCGGCTGCAGTGACAACATTGCCTAC 1096  
**D** H N V H G V **S** P E G F Q W S G C S D N I A Y 161  
 GGAGTGGCCTTTTCTCAGTCCTTTGTGGACGTTAGGGAGAGGGGTTAAAGGTCA<sup>GT</sup>TTCAGCCGAGCT 1165  
**G** V A F S Q **S** F V D V R E R G K G Q S **S** **S** R A 184  
 CTCATGAACCTTCACAACAATGAGGCTGGCAGAAAGGCCATTCTGTCCCACATGCGGGTGGAGTGAAG 1234  
**L** M **N** L H N **N** E A G R K A I L **S** H M R V E C K 207  
 TGTGATGGCGTGTGAGGCTCCTGTGAAGTAAAGACCTGTTGGAAGGCCATGCCACCCTTTAGAAAGGTG 1303  
**C** H G V S G S C E V K **T** C W K A M P P F R K V 230  
 GGCAATGTCATCAAGGAGAAGTTTGATGGTGCCACAGAGGTGGAGCAACGCAAGATGGGCTCAACCAA 1372  
**G** **N** V I K E K F D G A T E V E Q R K M G S **T** K 253  
 GTCCTGGTGCCTCGCAACTCTCAGTTTAAAGCCTCACACAGATGAAGACCTGTTTACCTGGACCCAGT 1441  
**V** L V P R N S Q F K P H T D E D L V Y L D P S 276  
 CCAGATTTTGTGACTATGATCCGCGAACGCCGGGCTGCTGGGCACGGTGGGCCAGTGAACAGA 1510  
**P** D F C D Y D P R **T** P G L L G T V G R Q C **N** R 299  
 ACCTCAAAGGCCATTGACGGCTGTGAGCTAATGTGCTGTGGCCGTGGCTTTCAGACACAAGAGGTGGAG 1579  
**T** S K A I D G C E L M C C G R G F Q T Q E V E 322  
 GTGGTGGACAGGTGCAGCTGTAAGTCCACTGGTGTCTATGTCAAATGCAAACAGTGCAGGAAAATG 1648  
**V** V D R C S C K F H W C C Y V K C K Q C R K M 345  
 GTGGAAATGCACACCTGCCGGTGA<sup>t</sup>ggatgtgggtggagcactgctgatggacaaagcaatcacccat 1717  
**V** E M H **T** C R \* 352  
 gttctatctcaacataaaaaacagagaaggcgacagggacttttgaagatgctgcctctcccacttgaag 1786  
 gccacctggccccgccactactggttgacagacagactgtcttttaaagggtcgctctatacattctta 1855  
 accaccgtgagtggaataaataagtaaatgcatggggttttccccaaaaaaaaaaaaaaaaaaaaaaaaaagt 1924

Fig.S1 Hu et al

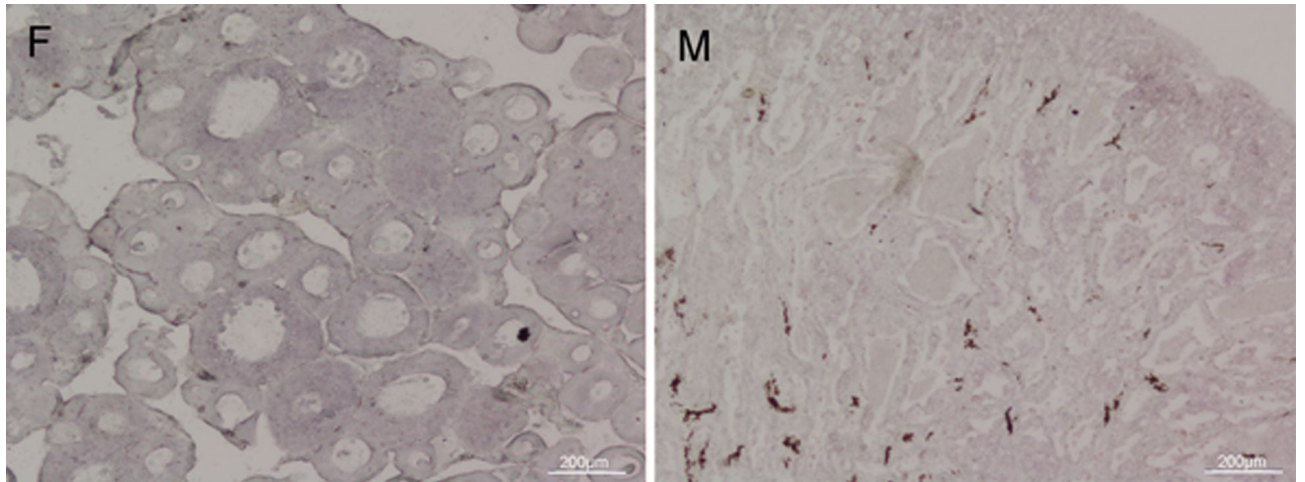

Fig.S2 Hu et al

| ANOVA    |      |    |      |        |      |
|----------|------|----|------|--------|------|
| VAR00002 |      |    |      |        |      |
|          | 平方和  | df | 均方   | F      | 显著性  |
| 组间       | .380 | 2  | .190 | 31.506 | .000 |
| 组内       | .145 | 24 | .006 |        |      |
| 总数       | .525 | 26 |      |        |      |

| VAR00002                |   |                  |       |       |
|-------------------------|---|------------------|-------|-------|
| Duncan <sup>a</sup>     |   |                  |       |       |
| VAR00001                | N | alpha = 0.05 的子集 |       |       |
|                         |   | 1                | 2     | 3     |
| 1.00                    | 9 | .1911            |       |       |
| 2.00                    | 9 |                  | .2702 |       |
| 3.00                    | 9 |                  |       | .4729 |
| 显著性                     |   | 1.000            | 1.000 | 1.000 |
| 将显示同类子集中的组均值。           |   |                  |       |       |
| a. 将使用调和均值样本大小 = 9.000。 |   |                  |       |       |

Fig S3 Hu et al



Table S1 Hu et al

| Primers          | Promer sequences (5'-3')                          | Utilizations              |
|------------------|---------------------------------------------------|---------------------------|
| UPM-long         | CTAATACGACTCACTATAGGGCAAGCAGTG<br>GTATCAACGCAGAGT | 5' or 3'RACE              |
| UPM-short        | CTAATACGACTCACTATAGGGC                            | 5' or 3'RACE              |
| Wnt4a-5'GSP      | AACTGAGAGTTGCGAGGCACCAGGAC                        | 5'region clone            |
| Wnt4a-3'GSP      | GAACCTTCACAACAATGAGGCTGGCA                        | 3'region clone            |
| Wnt4ash-S        | GCCGAATTCAGCACCAGTGGAACCTTACAGC                   | Situ hybridization        |
| Wnt4ash-A        | GCCGATATCTTTGCGGTAACGAGGGC                        | Situ hybridization        |
| Wnt4a-S1         | TAAAGGTCAGTCTTCCAGCCGA                            | qRT-PCR                   |
| Wnt4a-A1         | TGGCACCATCAAACCTTCTCCTT                           | qRT-PCR                   |
| $\beta$ -Actin-f | CCAACAGGGAAAAGATGACC                              | Internal control          |
| $\beta$ -Actin-r | TTCTCCTTGATGTCACGCAC                              | Internal control          |
| Wnt4aMS-S        | GTTGTGAGAAGTGAAGATATAGGAGTAG                      | DNA methylation           |
| Wnt4aMS-A        | CAAACACTCCAACCACTAAAAATAC                         | DNA methylation           |
| CseF382F         | 5'ATTCACTGACCCCTGAGAGC3'                          | Genetic sex determination |
| CseF382R         | 5'TGGCACCATCATTGTAAACTA3'                         | Genetic sex determination |

Table S2.Hu et al

| Species name                  | Accession number   |
|-------------------------------|--------------------|
| Gasterosteus aculeatus        | ENSGACG00000010904 |
| Oreochromis niloticus         | XP_003442666.1     |
| Tetraodon nigrovirdis         | ENSTNIG00000007371 |
| Epinephelus coioides          | KC206549.1         |
| Maylandia zebra               | XP_004559969.1     |
| Dicentrarchus labrax          | CBN80604.1         |
| Oncorhynchus mykiss a2        | NP_001268268.1     |
| Oncorhynchus mykiss a1        | NP_001268339.1     |
| Xiphophorus maculatus         | XP_005799140.1     |
| Oryzias latipes               | NP_001153911.1     |
| Gadus morhua                  | ENSGMOG00000016283 |
| Astyanax fasciatus mexicanus  | ENSAMXG00000003592 |
| Danio rerio                   | NP_001035477.1     |
| Mus musculus                  | NP_033549.1        |
| Homo sapiens                  | NP_110388.2        |
| Equus caballus                | XP_005607536.1     |
| Bubalus bubalis               | AFH66793.1         |
| Pan troglodytes               | XP_524597.3        |
| Rattus norvegicus             | NP_445854.1        |
| Cynoglossus semilaevis        | KJ825677           |
| Latimeria chalumnae           | ENSLACG00000014986 |
| lepisosteus oculatus          | ENSLOCG00000001126 |
| cavia porcellus               | ENSCPOG00000005809 |
| macaca mulatta                | XP_001100814.1     |
| bDanio rerio                  | ENSDARG00000040159 |
| bAstyanax fasciatus mexicanus | ENSAMXG00000010599 |
| bGadus morhua                 | ENSGMOG00000015702 |
| bGasterosteus aculeatus       | ENSGACG00000010089 |
| bOreochromis niloticus        | ENSONIG00000012962 |
| bOryzias latipes              | ENSORLG00000012515 |
| bTakifugu rubripes            | ENSTRUG00000007912 |
| bTetraodon nigrovirdis        | ENSTNIG00000003321 |
| capitella teleta              | ELU08380.1         |
| Azumapecten farreri           | AFU35435.1         |
| Takifugu rubripes             | XP_003973796.1     |
| Haplochromis burtoni          | XP_005933542       |
